# Supplementary material for: Clinical impact of SUVmax of interstitial lesions in lung cancer patients with interstitial lung disease who underwent pulmonary resection
Source: PubMed Central journal article supplement — J Thorac Dis. 2022 Oct;14(10):3801–10. doi: 10.21037/jtd-22-604 (PMC9641318; doi:10.21037/jtd-22-604), 2022-10
Supplement: jtd-14-10-3801-supplementary.pdf [file jtd-14-10-3801-supplementary.pdf]

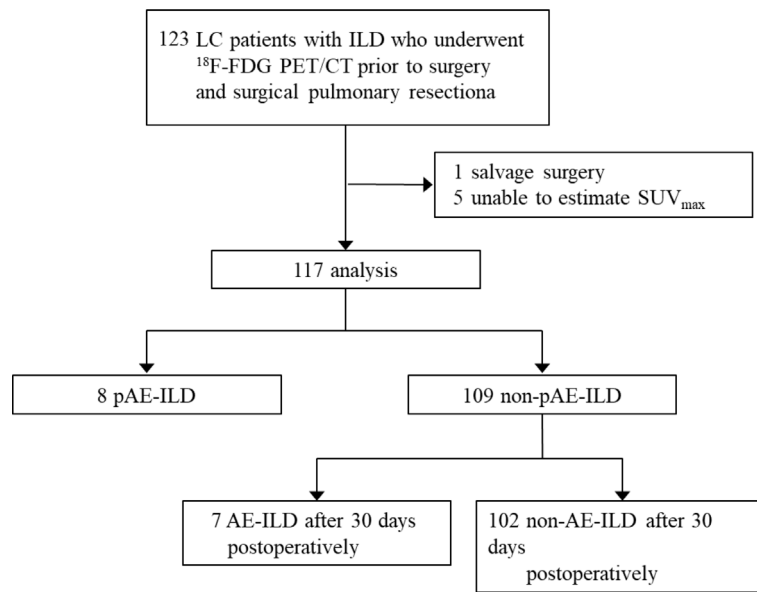

**Figure S1** Patient flow. \*, pAE-ILD: AE-ILD occurring within 30 days postoperatively. LC, lung cancer; ILD, interstitial lung disease;  $^{18}\text{F}$ -FDG PET/CT, fluorine-18 2-fluoro-2-deoxy-D-glucose positron emission tomography/computed tomography;  $\text{SUV}_{\text{max}}$ , maximum standardized uptake value; AE-ILD, acute exacerbation of ILD; pAE-ILD, postoperative AE-ILD.

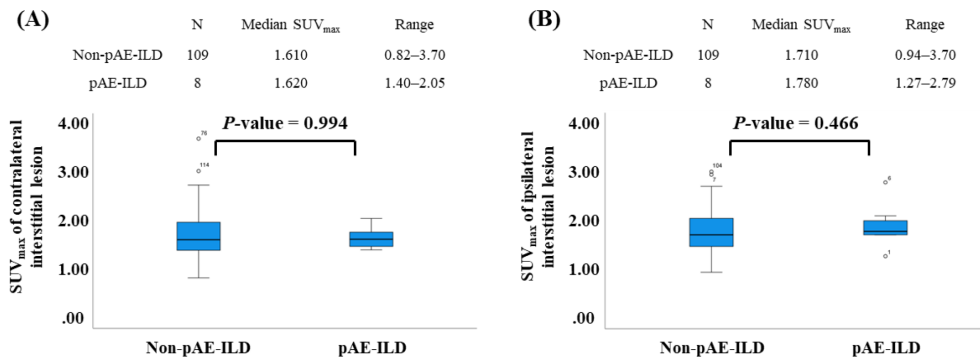

**Figure S2** Correlation between the incidence of pAE-ILD and  $\text{SUV}_{\text{max}}$  of (A) contralateral and (B) ipsilateral interstitial lesions. ILD, interstitial lung disease;  $\text{SUV}_{\text{max}}$ , maximum standardized uptake value.

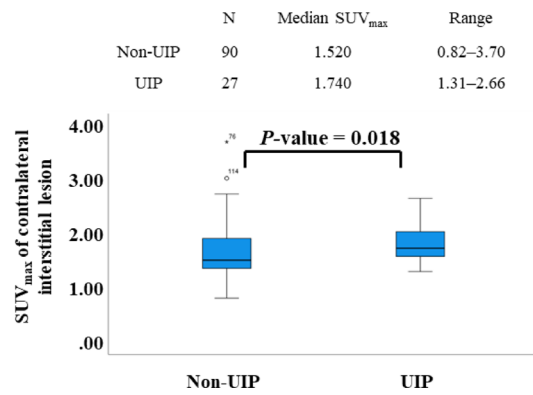

**Figure S3** Correlation between SUV<sub>max</sub> of contralateral interstitial lesions and ILD pattern. ILD, interstitial lung disease; SUV<sub>max</sub>, maximum standardized uptake value.

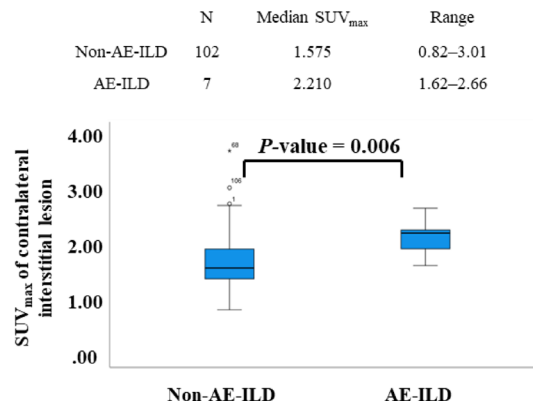

**Figure S4** Correlation between SUV<sub>max</sub> of contralateral interstitial lesions and the incidence of AE-ILD after 30 days postoperatively. SUV<sub>max</sub>, maximum standardized uptake value; AE-ILD, acute exacerbation of interstitial lung disease.
